# Supplementary material for: Clinical Implications of Monitoring Circulating Tumor DNA in Patients with Colorectal Cancer
Source: Oxford University Press journal article supplement (doi:10.1158/1078-0432.ccr-17-0510), 2017-06-09
Supplement: 10780432ccr170510-sup-179331_2_supp_4059452_cqwr57.xlsx [file 10780432ccr170510-sup-179331_2_supp_4059452_cqwr57.xlsx]

## Sheet: 1
	Supplementary Table 1. Primers, TaqMan probes and amplification protocols for PCR and ddPCR assays. All probes contain a 5' 6-FAM or HEX and a 3´black hole quencher-1 (BHQ-1).
	Assay	Sense primer (5’-3’)	Amplicon length (bp)	Amplification protocol
		Antisense primer (5’-3’)
		Probe (5’-3’)
	KRAS (exon1 - PCR)	TCATTATTTTTATTATAAGGCCTGCTGAA	189	94°C 5’, (94°C 30’‘, 66°C 30’‘) x45, 94°C 30'’& 40°C 30''
		CAAAGACTGGTCCTGCACCAGTA
	KRAS (exon2 - PCR)	CAGACTGTGTTTCTCCCTTC	243	94°C 5’, (94°C 30’‘, 66°C 30’‘) x45, 94°C 30'’& 40°C 30''
		ACTCCTTAATGTCAGCTTATTATATTCAA
	Chr3 (Reference)	CTAGAAGATCTACCTCCAAGAGG		95°C 10’, (95°C 30’‘, 58°C 30’‘) x45 & 98°C 10’
		CCAGGCTGAAGCTATTCCAG	82
		CTCATACATCTGGCATATGGGCTGG
	gCYC (Reference)	ACATGGGTACTAAGCAACAAAATAAG		95°C 10’, (95°C 30’‘, 58°C 30’‘) x45 & 98°C 10’
		CACAATTGGAACATCTTTGTTAAAC	132
		TTGCAGACAAGGTCCCAAAGACAGCA
	CPP1 (Purification control)			95°C 10’, (95°C 30’‘, 58°C 30’‘) x45 & 98°C 10’
		Reference 1
	PBC (Lymphocyte contamination control)	Reference 1		95°C 10’, (95°C 30’‘, 58°C 30’‘) x45 & 98°C 10’
		ATTTTGGTCTAGCTACAGA		95°C 10’, (95°C 30’‘, 60°C 60’‘) x45 & 98°C 10’
	BRAF (V600E)§	TGGATCCAGACAACTGTTC	69
		ATCTCGATGGAGTG
	KRAS (G13D)§	CTGCTGAAAATGACTGA		95°C 10’, (95°C 30’‘, 60°C 60’‘) x45 & 98°C 10’
		CACTCTTGCCTACGT	56
		CTTGTGGTAGTTGGA
	KRAS (G12V)§	CCTGCTGAAAATGACTG		95°C 10’, (95°C 30’‘, 60°C 60’‘) x45 & 98°C 10’
		TTGCCTACGCCAA	56
		CTTGTGGTAGTTGGA
	KRAS (G12A)§	CTGCTGAAAATGACTGA		95°C 10’, (95°C 30’‘, 60°C 60’‘) x45 & 98°C 10’
		TTGCCTACGCCAG	56
		CTTGTGGTAGTTGGA
	KRAS (G12C)§	CTGCTGAAAATGACTGA		95°C 10’, (95°C 30’‘, 58.7°C 60’‘) x45 & 98°C 10’
		TTGCCTACGCCACA	56
		CTTGTGGTAGTTGGA
	KRAS (G12D)§	CCTGCTGAAAATGACTG		95°C 10’, (95°C 30’‘, 60°C 60’‘) x45 & 98°C 10’
		CTTGCCTACGCCAT	56
		CTTGTGGTAGTTGGA
	KRAS (G12S)§	CCTGCTGAAAATGACTG		95°C 10’, (95°C 30’‘, 60°C 60’‘) x45 & 98°C 10’
		TTGCCTACGCCACT	56
		CTTGTGGTAGTTGGA
	KRAS (Q61H)§	GTAATTGATGGAGAAACCTGT		95°C 10’, (95°C 30’‘, 60°C 60’‘) x45 & 98°C 10’
		TGCACTGTACTCCTCA	66
		GGATATTCTCGAC
	1Pallisgaard N AR, Spindler KG, Jakobsen A. European Journal of Cancer.Vol 49:suppl.4, Abstract MC13-088, 2013.
	§ primers and probes were LNA modified

## Sheet: 2
	Supplementary Table 2. Basic mate pair and WES characteristics
	Cohort	Pt ID	Sample	Mate pair or WES protocol	Mapped reads	Estimated read lenght	Useful reads (GB)	Median read depth (*)	Median insert size	Physical read depth
	1	N029-01	Tumor	Mate pair library v2	21513384	50	1.1	0.4	2193	7.1824
	1	N029-02	Tumor	Mate pair library v2	67991066	50	3.4	1.2	2406	27.7908
	1	N029-03	Tumor	Mate pair library v2	17708323	50	0.9	0.3	1794	5.0858
	1	N029-04	Tumor	Mate pair library v2	33055958	50	1.7	6	2073	11.6969
	1	N029-05	Germline	Transposon	73883169	86.8761	6.4	2.2	2994	36.6744
	1	N029-05	Tumor	Mate pair library v2	42324457	50	2.1	0.7	2773	20.067
	1	N029-06	Tumor	Mate pair library v2	30660816	50	1.5	0.5	2563	13.3162
	1	N029-07	Tumor	Mate pair library v2	31829646	50	1.6	0.5	2936	15.9363
	1	N029-08	Germline	Mate pair library v2	72990196	50	3.6	1.3	3122	38.9631
	1	N029-08	Tumor	Transposon	58715510	76.9476	4.5	1.6	2555	25.0993
	1	N029-09	Tumor	Mate pair library v2	67936672	50	3.4	1.2	2952	33.3439
	1	N029-10	Germline	Mate pair library v2	82981371	50	4.1	1.4	2982	42.2627
	1	N029-10	Tumor	Transposon	51779354	77.5295	4	1.4	2625	22.58
	1	N029-11	Tumor	Mate pair library v2	20250256	50	1	0.3	2955	10.0196
	1	N029-12	Tumor	Mate pair library v2	27607922	50	1.4	0.5	2879	13.4923
	1	N029-13	Germline	Transposon	65823861	86.2083	5.7	2	3235	35.6008
	1	N029-13	Tumor	Mate pair library v2	52784579	50	2.6	0.9	1779	15.6549
	1	N029-14	Germline	Transposon	41359042	82.884	3.4	1.2	3321	22.9587
	1	N029-14	Tumor	Mate pair library v2	49001449	50	2.5	0.8	2993	24.9918
	1	N029-15	Tumor	Mate pair library v2	37136110	50	1.9	0.6	3051	19.3416
	1	N029-16	Germline	Mate pair library v2	75600526	50	3.8	1.3	2989	38.5842
	1	N029-16	Tumor	Transposon	45796078	77.4788	3.5	1.2	2965	22.5328
	1	N029-17	Tumor	Mate pair library v2	32205970	50	1.6	0.6	2302	12.4281
	1	N029-18	Germline	Transposon	95614208	83.3577	8	2.8	4392	70.8797
	1	N029-18	Tumor	Mate pair library v2	25056830	50	1.3	0.4	2856	12.0255
	1	N029-19	Tumor	Mate pair library v2	75551380	50	3.8	1.3	2922	37.6945
	1	N029-20	Germline	Transposon	52922300	77.0896	4.1	1.4	2381	20.9805
	1	N029-20	Tumor	Mate pair library v2	67584338	50	3.4	1.2	2819	31.764
	1	N029-21	Tumor	Transposon	292919954	79.3039	23.2	8	2572	124.38
	1	N029-22	Tumor	Mate pair library v2	72042397	50	3.6	1.2	2847	34.9978
	1	N029-23	Tumor	Mate pair library v2	84710124	50	4.2	1.5	2882	41.6103
	1	N029-24	Tumor	Mate pair library v2	64894996	50	3.2	1.1	2840	31.4349
	1	N029-25	Tumor	Mate pair library v2	34771396	50	1.7	0.6	2927	17.2948
	1	N029-26	Tumor	Mate pair library v2	26808400	50	1.3	0.5	2917	13.1141
	1	N029-27	Tumor	Mate pair library v2	45503744	50	2.3	0.8	2817	21.7881
	2	N030-3	Germline	WES	29817840	150	NR	49.1	NR	NR
	2	N030-3	Tumor	WES	25406285	150	NR	42.2	NR	NR
	2	N030-6	Germline	WES	26075890	150	NR	43.1	NR	NR
	2	N030-6	Tumor	WES	30373939	150	NR	51.5	NR	NR
	2	N030-8	Germline	WES	30806786	150	NR	51.5	NR	NR
	2	N030-8	Tumor	WES	29851589	150	NR	49.4	NR	NR
	2	N030-15	Germline	WES	26953712	150	NR	44.7	NR	NR
	2	N030-15	Tumor	WES	27904053	150	NR	47	NR	NR
	2	N030-17	Germline	WES	28538740	150	NR	47.2	NR	NR
	2	N030-17	Tumor	WES	41270074	150	NR	69.9	NR	NR
	2	N030-18	Germline	WES	29863871	150	NR	49.9	NR	NR
	2	N030-18	Tumor	WES	25880209	150	NR	43.2	NR	NR
	NR = not relevant

## Sheet: 3
	Supplementary Table 3. Somatic structural variants and point mutations identified in primary tumor and profiled in plasma
	Cohort	Patient ID	Class	Chr	Gene	Identified by	ddPCR assay
	1	N029-01	Inversion	1	-	Mate-pair seq	C1I1
	1	N029-01	Deletion	2	-	Mate-pair seq	C2D1
	1	N029-01	Deletion	11	-	Mate-pair seq	C11D1
	1	N029-01	Deletion	16	-	Mate-pair seq	C16D3
	1	N029-01	Deletion	16	-	Mate-pair seq	C16D1
	1	N029-01	SPM	12	KRAS	HRMA	G13D
	1	N029-02	Deletion	1	-	Mate-pair seq	C1D1
	1	N029-02	Deletion	3	-	Mate-pair seq	C3D3
	1	N029-02	Deletion	4	-	Mate-pair seq	C4D1
	1	N029-02	Deletion	11	-	Mate-pair seq	C11D1
	1	N029-02	Intra-chromosomal translocation	13	-	Mate-pair seq	C13ITX2
	1	N029-02	SPM	12	KRAS	HRMA	G13D
	1	N029-03	Deletion	5	-	Mate-pair seq	C5D1
	1	N029-03	Intra-chromosomal translocation	15	-	Mate-pair seq	C15ITX1
	1	N029-04	Deletion	1	-	Mate-pair seq	C1D1
	1	N029-04	Deletion	2	-	Mate-pair seq	C2D1
	1	N029-04	Deletion	7	-	Mate-pair seq	C7D1
	1	N029-04	Deletion	10	-	Mate-pair seq	C10D1
	1	N029-05	Deletion	1	-	Mate-pair seq	C1D2
	1	N029-05	Inversion	1	-	Mate-pair seq	C1I1
	1	N029-05	Deletion	5	-	Mate-pair seq	C5D1
	1	N029-05	Deletion	12	-	Mate-pair seq	C12D1
	1	N029-05	SPM	12	KRAS	HRMA	G12V
	1	N029-06	Intra-chromosomal translocation	10	-	Mate-pair seq	C10ITX
	1	N029-06	Deletion	20	-	Mate-pair seq	C20D2
	1	N029-06	Deletion	20	-	Mate-pair seq	C20D3
	1	N029-06	Inversion	20	-	Mate-pair seq	C20I1
	1	N029-07	Deletion	21	-	Mate-pair seq	C21D4
	1	N029-07	SPM	12	KRAS	HRMA and WES	G12A
	1	N029-08	Deletion	7	-	Mate-pair seq	C7D1
	1	N029-08	Deletion	1	-	Mate-pair seq	C1D1
	1	N029-08	Deletion	3	-	Mate-pair seq	C3D1
	1	N029-08	Deletion	15	-	Mate-pair seq	C15D1
	1	N029-08	Deletion	16	-	Mate-pair seq	C16D2
	1	N029-09	Deletion	8	-	Mate-pair seq	C8D1
	1	N029-09	Deletion	8	-	Mate-pair seq	C8D2
	1	N029-09	Deletion	16	-	Mate-pair seq	C16D1
	1	N029-10	Deletion	7	-	Mate-pair seq	C7D2
	1	N029-10	Deletion	3	-	Mate-pair seq	C3D1
	1	N029-10	Deletion	6	-	Mate-pair seq	C6D1
	1	N029-10	Deletion	9	-	Mate-pair seq	C9D1
	1	N029-10	SPM	3	PIK3CA	WES	PIK3CA_E542K
	1	N029-11	Deletion	13	-	Mate-pair seq	C13D1
	1	N029-11	Deletion	20	-	Mate-pair seq	C20D1
	1	N029-11	Intra-chromosomal translocation	20	-	Mate-pair seq	C20ITX3
	1	N029-12	Intra-chromosomal translocation	2	-	Mate-pair seq	C2ITX1
	1	N029-12	Inversion	13	-	Mate-pair seq	C13I1
	1	N029-12	Deletion	16	-	Mate-pair seq	C16D1
	1	N029-12	Deletion	16	-	Mate-pair seq	C16D2
	1	N029-12	Deletion	17	-	Mate-pair seq	C17D1
	1	N029-12	Inversion	17	-	Mate-pair seq	C17I1
	1	N029-12	SPM	17	TP53	WES	TP53_R196*
	1	N029-13	Inversion	1	-	Mate-pair seq	C1I1
	1	N029-13	Intra-chromosomal translocation	6	-	Mate-pair seq	6ITX2
	1	N029-13	Inversion	8	-	Mate-pair seq	C8I1
	1	N029-13	Intra-chromosomal translocation	14	-	Mate-pair seq	C14ITX1
	1	N029-13	SPM	17	MAP2K4	WES	MAPK2K4_G>T
	1	N029-14	Intra-chromosomal translocation	8	-	Mate-pair seq	C8ITX1
	1	N029-14	Deletion	1	-	Mate-pair seq	C12D1
	1	N029-14	Inversion	1	-	Mate-pair seq	C13I1
	1	N029-14	Inversion	2	-	Mate-pair seq	C20I1
	1	N029-14	Inversion	20	-	Mate-pair seq	C20I2
	1	N029-15	Inversion	12	-	Mate-pair seq	C12I2
	1	N029-15	Deletion	12	-	Mate-pair seq	C12D1
	1	N029-16	Deletion	14	-	Mate-pair seq	C14D1
	1	N029-16	Deletion	6	-	Mate-pair seq	C6D3
	1	N029-16	Deletion	16	-	Mate-pair seq	C16D1
	1	N029-17	Deletion	2	-	Mate-pair seq	C2D1
	1	N029-17	Intra-chromosomal translocation	4	-	Mate-pair seq	C4ITX1
	1	N029-17	Deletion	16	-	Mate-pair seq	C16D3
	1	N029-17	Deletion	20	-	Mate-pair seq	C20D4
	1	N029-17	Intra-chromosomal translocation	20	-	Mate-pair seq	C20ITX1
	1	N029-18	Deletion	3	-	Mate-pair seq	C3D1
	1	N029-18	Deletion	16	-	Mate-pair seq	C16D1
	1	N029-18	Deletion	16	-	Mate-pair seq	C16D2
	1	N029-18	Deletion	16	-	Mate-pair seq	C16D3
	1	N029-18	Deletion	20	-	Mate-pair seq	C20D1
	1	N029-18	Deletion	20	-	Mate-pair seq	C20D2
	1	N029-19	Deletion	5	-	Mate-pair seq	C5D1
	1	N029-19	Inter-chromosomal translocaation	13	-	Mate-pair seq	C13T(13:8)2
	1	N029-19	Inter-chromosomal translocaation	13	-	Mate-pair seq	C13T(13:8)1
	1	N029-19	Inversion	8	-	Mate-pair seq	C8I1
	1	N029-19	Deletion	12	-	Mate-pair seq	C12D1
	1	N029-19	Deletion	12	-	Mate-pair seq	C12D2
	1	N029-20	SPM	12	KRAS	HRMA	G12V
	1	N029-21	Inversion	6	-	Mate-pair seq	C6I1
	1	N029-21	Deletion	20	-	Mate-pair seq	C20D1
	1	N029-21	SPM	12	KRAS	HRMA and WES	G12C
	1	N029-22	Deletion	3	-	Mate-pair seq	C3D3
	1	N029-22	Intra-chromosomal translocation	4	-	Mate-pair seq	C4ITX1
	1	N029-22	Deletion	6	-	Mate-pair seq	C6D3
	1	N029-22	Deletion	20	-	Mate-pair seq	C20D1
	1	N029-22	Deletion	20	-	Mate-pair seq	C20D2
	1	N029-22	SPM	12	KRAS	HRMA	G12D
	1	N029-23	Deletion	4	-	Mate-pair seq	C4D1
	1	N029-23	Inversion	12	-	Mate-pair seq	C12I1
	1	N029-23	Inversion	15	-	Mate-pair seq	C15I1
	1	N029-23	SPM	12	KRAS	HRMA	Q61H
	1	N029-24	Deletion	4	-	Mate-pair seq	C4D1
	1	N029-24	Deletion	17	-	Mate-pair seq	C17D1
	1	N029-24	Deletion	20	-	Mate-pair seq	C20D1
	1	N029-25	Deletion	1	-	Mate-pair seq	C1D1
	1	N029-25	Deletion	3	-	Mate-pair seq	C3D1
	1	N029-25	Deletion	4	-	Mate-pair seq	C4D1
	1	N029-25	Deletion	6	-	Mate-pair seq	C6D2
	1	N029-25	Deletion	16	-	Mate-pair seq	C16D1
	1	N029-25	SPM	5	APC	WES	APC_T>C
	1	N029-26	Deletion	1	-	Mate-pair seq	C1D1
	1	N029-26	Deletion	20	-	Mate-pair seq	C20D1
	1	N029-26	SPM	12	KRAS	HRMA	G12V
	1	N029-27	Deletion	9	-	Mate-pair seq	C9D2
	1	N029-27	Inversion	15	-	Mate-pair seq	C15I
	1	N029-27	Deletion	19	-	Mate-pair seq	C19D2
	1	N029-27	SPM	12	KRAS	HRMA	G12C
	2	N030-1	SPM	12	KRAS	WES	G12V
	2	N030-2	SPM	12	KRAS	WES	G12D
	2	N030-3	SPM	17	TP53	WES	Val274Phe
	2	N030-4	SPM	12	KRAS	WES	G12D
	2	N030-5	SPM	12	KRAS	WES	G13D
	2	N030-6	SPM	17	TP53	WES	Pro151Ser
	2	N030-7	SPM	7	BRAF	WES	Val600E
	2	N030-8	SPM	12	KRAS	WES	Ala146Val
	2	N030-9	SPM	7	BRAF	WES	Val600E
	2	N030-10	SPM	12	KRAS	WES	G13D
	2	N030-11	SPM	12	KRAS	WES	G12D
	2	N030-12	SPM	12	KRAS	WES	G12V
	2	N030-13	SPM	12	KRAS	WES	G13D
	2	N030-14	SPM	17	TP53	WES	Lys120Glu
	2	N030-15	SPM	12	KRAS	WES	G12D
	2	N030-16	SPM	17	TP53	WES	Val173Leu
	2	N030-17	SPM	5	APC	WES	Arg876*
	2	N030-18	SPM	12	KRAS	WES	G12V
	*Nonsense mutation

## Sheet: 4
	Supplementary Table 4. Clinicopathological patient characteristics
	Cohort	Patient ID	Age	Sex	Tumor site	Stage	TNMV	Primary treatment	Adj. therapy	First relapse after OP. month	Relapse site (month)	Relapse treatment	Number of plasma samples	Premature patient withdrawl (month)
	1	N029-01	81.7178	Male	Sigmoideum	II	T3N0M0	Sigmoid colectomy	No	None	None	None	15	-
	1	N029-02	77.3945	Male	Rectum	II	T3N0M0	Rectal resection	No	None	None	-	15	-
	1	N029-03	56.5425	Male	Ascending colon	II	T3N0M0	Right hemicolectomy	No	None	None	-	15	-
	1	N029-04	81.6466	Female	Sigmoideum	III	T3N2MV1	Sigmoid colectomy	Yes	15.2	Local (15.2). Liver & lung (24.9)	Surgery**, radiation	11	24.9
	1	N029-05	76.2493	Male	Descending colon	II	T3N0M0	Left hemicolectomy	No	None	None	-	14	-
	1	N029-06	70.4247	Male	Rectum	II	T3N0M0V1	Rectal resection	No	None	None	-	14	-
	1	N029-07	61.6055	Male	Cecum	III	T3N1M0V1	Right hemicolectomy	No	9.4	Liver(9.4)	None, patient refused	6	9.4
	1	N029-08	59.3644	Male	Rectum	III	T3N2M0	Rectal resection	No	28.1	Lung (28.1)	Surgery	15	-
	1	N029-09	78.3507	Female	Rectum	I	T2N0M0	Rectal resection	No	None	None	-	14	-
	1	N029-10	73.1945	Female	Rectum	IV	T3N1M1V1	Rectal resection, RFA	Yes	29.1	Liver (29.1)	RFA	14	-
	1	N029-11	60.6164	Male	Sigmoideum	I	T2N0M0	Sigmoid colectomy	No	None	None	-	15	-
	1	N029-12	80.6822	Male	Rectum	IV	T4N2M1V2	Rectal resection, RFA	No	13.1	Liver (13.1)	Radiation,chemo	14	30
	1	N029-13	62.8548	Male	Rectum	III	T3N2M0V1	Proctocolectomy	No	14	Local (14)	Radiation, surgery	14	-
	1	N029-14	61.9151	Male	Rectum	IV	T4N2M1V1	Rectal resection*	No	NA	NA	NA	4	3
	1	N029-15	64.9014	Male	Rectum	II	T3NXM0V1	Rectal resection	No	23.8	Local (23.8)	Surgery	14	33
	1	N029-16	56.3616	Female	Rectum	I	T2N0M0	Rectal resection	No	19.1	Liver (19.1)	Chemo	10	21
	1	N029-17	57.9315	Male	Sigmoideum	I	T2N0M0	Sigmoid colectomy	No	None	None	-	14	-
	1	N029-18	63.3452	Female	Sigmoideum	IV	T3N0M1	Sigmoid colectomy, right hepatectomy	No	32.3	Liver (32.3)	Surgery	13	-
	1	N029-19	59.4301	Male	Sigmoideum	IV	T3N1M1	Left hemicolectomy, RFA	Yes	None	None	-	15	-
	1	N029-20	56.1425	Female	Rectum	I	T2N0M0	Rectal resection	No	None	None	-	15	-
	1	N029-21	64.6164	Female	Sigmoideum	IV	T3N2M1V1	Left hemicolectomy, hepatectomy	Yes	9.4	Liver & lung (9.4)	RFA, Chemo	13	-
	1	N029-22	74.9123	Male	Descending colon	II	T3N0M0V1	Left hemicolectomy	No	None	None	-	15	-
	1	N029-23	65.011	Male	Rectum	III	T3N1M0V1	Rectal resection	No	12.4	Peritoneal (12.4)	Radiation, chemo,	14	-
	1	N029-24	60.8301	Female	Sigmoideum	III	T3N0M0	Sigmoid colectomy	No	6.3	Liver (6.3)	Surgery, RFA,	15	-
	1	N029-25	56.7452	Male	Rectum	III	T4N2M0	Rectal resection	No	12	Liver & lung (12)	Surgery, chemo	13	-
	1	N029-26	55.9479	Female	Sigmoideum	III	T4N1M0 / N0	Sigmoid colectomy	No	12.4	Local (12.4)	None	7	12.4
	1	N029-27	69.4219	Male	Sigmoideum	II	T3N0M0V1	Sigmoid colectomy	No	None	None	-	15	-
	2	N030-1	70.7726	Female	metachronous CRC liver metastasis	IV	NR	Hepatectomy	Yes	6.4	Liver (6.4)	RFA, surgery	1	-
	2	N030-2	79.1479	Male	metachronous CRC liver metastasis	IV	NR	Hepatectomy	Yes	22.1	Lung (22.1)	Surgery	1	-
	2	N030-3	76.1151	Male	metachronous CRC liver metastasis	IV	NR	Hepatectomy	No	9	Liver (9)	MWA, RFA	1	-
	2	N030-4	89.3863	Male	Synchronous CRC and liver metastasis	IV	T4N1M1	Rectal resection, hepatectomy	No	None	None	-	1	-
	2	N030-5	74.3644	Female	metachronous CRC liver metastasis	IV	NR	Hepatectomy	Yes	None	None	-	1	-
	2	N030-6	68.4493	Female	metachronous CRC liver metastasis	IV	NR	Hepatectomy	Yes	4	Liver (4)	RFA	1	-
	2	N030-7	64.6521	Male	metachronous CRC liver metastasis	IV	NR	Hepatectomy	Yes	None	None	-	1	-
	2	N030-8	67.4521	Male	metachronous CRC liver metastasis	IV	NR	Hepatectomy	Yes	None	None	-	1	-
	2	N030-9	77.863	Female	metachronous CRC liver metastasis	IV	NR	Hepatectomy	Yes	3	Liver (3)	-	1	-
	2	N030-10	70.3726	Female	metachronous CRC liver metastasis	IV	NR	Hepatectomy	Yes	12	Lung (12)	Surgery	1	-
	2	N030-11	71.589	Male	metachronous CRC liver metastasis	IV	NR	Hepatectomy	No	4.5	Liver (4.5)	RFA, surgery	1	-
	2	N030-12	76.2274	Male	metachronous CRC liver metastasis	IV	NR	Hepatectomy	No	None	None	-	1	-
	2	N030-13	72.6658	Male	metachronous CRC liver metastasis	IV	NR	Hepatectomy	No	4	Liver (4)	Chemo	1	-
	2	N030-14	61.4356	Male	metachronous CRC liver metastasis	IV	NR	Hepatectomy	Yes	9.2	Lung (9.2)	MWA	1	-
	2	N030-15	44.7753	Male	Synchronous CRC and liver metastasis	IV	T4N2M1	Right hemicolectomy, hepatectomy	No	6.7	Lung (6.7)	Surgery	1	-
	2	N030-16	63.4685	Male	metachronous CRC liver metastasis	IV	NR	Hepatectomy	No	None	None	-	1	-
	2	N030-17	53.1178	Male	Synchronous CRC and liver metastasis	IV	T4N2M1	Sigmoid colectomy, hepatectomy	Yes	12	Liver (12)	RFA	1	-
	2	N030-18	58.0493	Female	metachronous CRC liver metastasis	IV	NR	Hepatectomy	Yes	None	None	-	1	-
	NR = not relevant
	* Palliative surgery
	** Supravaginal hysterectomy, small bowel resection, and salpingo-oophorectomy.

## Sheet: 5
	Supplementary Table 5. Relapse detection by standard-of-care CT imaging, ctDNA and CEA analysis
					ctDNA					CEA
	Cohort	Patient ID	Relapse	First relapse after OP (CT imaging)	Number of assays	Pre-OP positive	Relapse month after OP	Lead time		Threshold (µg/L)*	Pre-OP positive	Relapse month after OP	Lead time
	1	N029-01	No	none	6	No	none	NR		6	Yes	none	NR
	1	N029-02	No	none	6	Yes	none	NR		6	Yes	none	NR
	1	N029-03	No	none	2	Yes	none	NR		4	Yes	none	NR
	1	N029-04	Yes	15.2	4	Yes	0.3	14.9		6	Yes	12	3.2
	1	N029-05	No	none	5	No	none	NR		6	Yes	none	NR
	1	N029-06	No	none	4	Yes	none	NR		6	Yes	none	NR
	1	N029-07	Yes	9.4	2	No	1	8.4		6	Yes	6	3.4
	1	N029-08	Yes	28.1	5	Yes	21	7.1		4	NA	ND	0
	1	N029-09	No	none	3	Yes	none	NR		4	Yes	none	NR
	1	N029-10	Yes	29.1	5	Yes	18	11.1		4	No	ND	0
	1	N029-11	No	none	3	Yes	none	NR		4	No	none	NR
	1	N029-12	Yes	13.1	7	Yes	1	12.1		6/4	Yes	9	4.1
	1	N029-13	Yes	14	5	Yes	9	5.0		4	Yes	3	11
	1	N029-14	NA	NA	5	Yes	NA	NA		4	Yes	NA	NA
	1	N029-15	Yes	23.8	2	Yes	12	11.8		4	Yes	33	-9.2
	1	N029-16	Yes	19.1	3	No	6	13.1		6	No	12	7.1
	1	N029-17	No	none	5	No	none	NR		4	No	none	NR
	1	N029-18	Yes	32.3	6	Yes	30	2.3		6	No	21	11.3
	1	N029-19	No	none	6	Yes	none	NR		6	No	none	NR
	1	N029-20	No	none	1	Yes	none	NR		6	No	none	NR
	1	N029-21	Yes	9.4	3	Yes	9	0.4		6/4	No	15	-5.6
	1	N029-22	No	none	6	No	none	NR		4	No	none	NR
	1	N029-23	Yes	12.4	4	Yes	3	9.4		6	yes	9	3.4
	1	N029-24	Yes	6.3	3	Yes	0.3	6.0		4	No	6	0.3
	1	N029-25	Yes	12	6	Yes	1	11		6	No	ND	0
	1	N029-26	Yes	12.4	3	Yes	3	9.4		4	Yes	9	3.4
	1	N029-27	No	none	4	No	none	NR		4	Yes	none	NR
	1	Mean	-	16.9	4.2	-	8.2	8.7		5.0	-	12.3	2.3
	2	N030-1	Yes	6.4	1	Yes	none	0		NR	NR	NR	NR
	2	N030-2	Yes	22.1	1	Yes	none	0		NR	NR	NR	NR
	2	N030-3	Yes	9	1	Yes	1	8		NR	NR	NR	NR
	2	N030-4	No	none	1	Yes	none	NR		NR	NR	NR	NR
	2	N030-5	No	none	1	No	none	NR		NR	NR	NR	NR
	2	N030-6	Yes	4	1	Yes	none	0		NR	NR	NR	NR
	2	N030-7	No	none	1	Yes	none	NR		NR	NR	NR	NR
	2	N030-8	No	none	1	Yes	none	NR		NR	NR	NR	NR
	2	N030-9	Yes	3	1	Yes	1	2		NR	NR	NR	NR
	2	N030-10	Yes	13.5	1	Yes	none	0		NR	NR	NR	NR
	2	N030-11	Yes	4.5	1	No	3	1.5		NR	NR	NR	NR
	2	N030-12	No	none	1	Yes	none	NR		NR	NR	NR	NR
	2	N030-13	Yes	4	1	Yes	3	1		NR	NR	NR	NR
	2	N030-14	Yes	9.2	1	Yes	3	6.2		NR	NR	NR	NR
	2	N030-15	Yes	6.7	1	Yes	none	0		NR	NR	NR	NR
	2	N030-16	No	none	1	Yes	none	NR		NR	NR	NR	NR
	2	N030-17	Yes	12	1	Yes	1	11		NR	NR	NR	NR
	2	N030-18	No	none	1	Yes	none	NR		NR	NR	NR	NR
	2	Mean	-	8.6	1.0	-	2	2.7		-	-	-	-
	* Threshold is set to 6 µg/L for smokers and 4µg/L for non-smokers
	NA = not applicable
	ND= not detected
	NR = not relevant

## Sheet: 6
	Supplementary Table 6. Summary of plasma samples for DNA purification
	Cohort	Patient ID	Visit	GE/mL plasma	GE/assay	PBC DNA contamination	Plasma for DNA extraction (ul)
	1	N029-01	Pre op	734.643	653.4	0	4500
	1	N029-01	Dag 8	1071.62	1069.2	0	4300
	1	N029-01	Dag 30	582.366	374.22	0	3450
	1	N029-01	3 mdr	502.388	415.8	0	3350
	1	N029-01	6 mdr	1885.07	1306.8	0	3350
	1	N029-01	9 mdr	838.355	772.2	0	3700
	1	N029-01	12 mdr	654.529	445.5	0	3700
	1	N029-01	15 mdr	1443.32	1009.8	0	3700
	1	N029-01	18 mdr	1254.27	950.4	0	4100
	1	N029-01	21 mdr	748.908	712.8	0	3900
	1	N029-01	24 mdr	809.877	510.84	0	2800
	1	N029-01	27 mdr	955.174	891	0	4100
	1	N029-01	30 mdr	870.432	831.6	0	4100
	1	N029-01	33 mdr	808.107	891	0	4500
	1	N029-01	36 mdr	1139.53	831.6	0	4000
	1	N029-02	Pre op	2662	1722.6	0	3000
	1	N029-02	Dag 8	15241.8	14196.6	0	3650
	1	N029-02	Dag 30	2289.1	1722.6	0	3450
	1	N029-02	3 mdr	2432	1128.6	0	2850
	1	N029-02	6 mdr	848.367	178.2	0	2250
	1	N029-02	9 mdr	2044.22	1009.8	0	3500
	1	N029-02	12 mdr	1811.34	1188	0	3450
	1	N029-02	15 mdr	2728.12	2138.4	0	3900
	1	N029-02	18 mdr	2152.67	1722.6	0	4000
	1	N029-02	21 mdr	1723.43	950.4	0	3700
	1	N029-02	24 mdr	3293.35	1722.6	0	3100
	1	N029-02	27 mdr	2359.11	1425.6	0	3800
	1	N029-02	30 mdr	1770.73	1485	0	4100
	1	N029-02	33 mdr	3249.7	2079	0	4100
	1	N029-02	36 mdr	3581.57	2257.2	0	3900
	1	N029-03	Pre op	582.445	950.4	0	3900
	1	N029-03	Dag 8	2981.16	3920.4	0	3900
	1	N029-03	Dag 30	1428	1603.8	0	3750
	1	N029-03	3 mdr	765.537	742.5	0	2500
	1	N029-03	6 mdr	1633.59	831.6	0	3200
	1	N029-03	9 mdr	982.554	1009.8	0	3750
	1	N029-03	12 mdr	607.944	950.4	0	3700
	1	N029-03	15 mdr	438.543	350.46	0	3700
	1	N029-03	18 mdr	804.636	950.4	0	4000
	1	N029-03	21 mdr	1032.31	671.22	0	3600
	1	N029-03	24 mdr	679.704	891	0	3800
	1	N029-03	27 mdr	998.416	1009.8	0	3600
	1	N029-03	30 mdr	855.532	772.2	0	3550
	1	N029-03	33 mdr	1056.7	1306.8	0	3200
	1	N029-03	36 mdr	670.063	528.66	0	3250
	1	N029-04	Pre op	4171.21	594	Yes*	1200
	1	N029-04	Dag 8	6091.59	2376	0	2000
	1	N029-04	Dag 30	4224.22	1278.09	0	1800
	1	N029-04	3 mdr	1862.84	665.28	0	1900
	1	N029-04	6 mdr	1275.1	530.64	0	2000
	1	N029-04	9 mdr	2428.95	563.31	0	1700
	1	N029-04	12 mdr	1342.17	403.92	0	1350
	1	N029-04	15 mdr	2590.41	837.54	0	1700
	1	N029-04	18 mdr	1801.62	766.26	0	1900
	1	N029-04	21 mdr	2055.28	698.94	0	1900
	1	N029-04	24 mdr	14859.7	2811.6	0	1700
	1	N029-05	Pre op	3291.2	1009.8	0	3500
	1	N029-05	8 dag	2076.16	2019.6	0	4200
	1	N029-05	30 dag	1586.18	1603.8	0	4300
	1	N029-05	3 mdr	833.919	534.6	0	3700
	1	N029-05	6 mdr	1282.06	891	0	3800
	1	N029-05	9 mdr	650.702	362.34	0	3250
	1	N029-05	12 mdr	2150.95	1247.4	0	3200
	1	N029-05	15 mdr	1058.67	594	0	3350
	1	N029-05	18 mdr	1137.28	772.2	0	3250
	1	N029-05	21 mdr	1216.5	1009.8	0	3790
	1	N029-05	24 mdr	1195.93	1069.2	0	4300
	1	N029-05	27 mdr	1190.39	1128.6	0	3600
	1	N029-05	33 mdr	1039.8	1663.2	0	3900
	1	N029-05	36 mdr	765.633	772.2	0	3900
	1	N029-06	Pre op	10154.1	2296.8	0	3200
	1	N029-06	8 dag	40111.5	8712	0	3600
	1	N029-06	30 dag	12678.2	1821.6	0	3100
	1	N029-06	3 mdr	7411.56	2138.4	0	3150
	1	N029-06	6 mdr	9675.08	3643.2	0	1100
	1	N029-06	9 mdr	4589.19	792	0	2050
	1	N029-06	12 mdr	6625.71	1821.6	0	3500
	1	N029-06	15 mdr	8683.93	1504.8	0	2600
	1	N029-06	18 mdr	5463.15	1267.2	0	3700
	1	N029-06	21 mdr	6201.25	1267.2	0	3300
	1	N029-06	27 mdr	8761.3	1663.2	0	3650
	1	N029-06	30 mdr	5785.31	1267.2	0	3500
	1	N029-06	33 mdr	6084.33	1742.4	0	4000
	1	N029-06	36 mdr	5663.02	1584	0	3250
	1	N029-07	Pre op	1594.18	297	0	2500
	1	N029-07	8 dag	2330.2	376.2	0	2000
	1	N029-07	30 dag	2544.18	574.2	0	2500
	1	N029-07	3 mdr	1657.88	356.4	0	2500
	1	N029-07	7 mdr	8671.32	1544.4	0	2500
	1	N029-07	9 mdr	50582	9543.6	0	2500
	1	N029-08	Pre op.	1374.24	1149.39	0	3800
	1	N029-08	8 dag	7594.39	5120.28	0	3600
	1	N029-08	30 dag	1553.95	1452.33	0	3550
	1	N029-08	3 mdr.	1267.19	1261.66	0	3600
	1	N029-08	6 mdr.	1306.15	804.87	0	3400
	1	N029-08	9 mdr.	779.227	675.378	0	3550
	1	N029-08	12 mdr.	1729.9	1767.15	0	3300
	1	N029-08	15 mdr.	895.975	759.132	0	3330
	1	N029-08	18 mdr.	638.306	608.256	0	3700
	1	N029-08	21 mdr.	1025.1	855.36	0	3600
	1	N029-08	24 mdr.	897.158	751.41	0	3800
	1	N029-08	27 mdr.	1086.7	713.691	0	3230
	1	N029-08	30 mdr.	820.3	688.743	0	3100
	1	N029-08	33 mdr.	2890.31	2673	0	3850
	1	N029-08	36 mdr.	795.743	589.248	0	3750
	1	N029-09	Pre op.	601.384	221.76	0	3700
	1	N029-09	8 dag	3762.8	2534.4	0	4100
	1	N029-09	30 dag	1874.28	1108.8	0	4200
	1	N029-09	3 mdr.	1607.74	831.6	0	4100
	1	N029-09	6 mdr.	1243.24	871.2	0	3900
	1	N029-09	9 mdr.	1688.54	1108.8	0	3800
	1	N029-09	12 mdr.	1607.03	1029.6	0	4200
	1	N029-09	15 mdr.	991.046	1029.6	0	4700
	1	N029-09	21 mdr.	1153.86	427.68	0	3800
	1	N029-09	24 mdr.	843.4	641.52	0	3900
	1	N029-09	27 mdr.	624.75	491.04	0	4400
	1	N029-09	30 mdr.	1430.26	950.4	0	4000
	1	N029-09	33 mdr.	711.151	293.04	0	4300
	1	N029-09	36 mdr.	549.312	617.76	0	4000
	1	N029-10	Pre op	2107.16	543.51	0	1800
	1	N029-10	Dag 8	25280.1	6365.7	0	1700
	1	N029-10	Dag 30	5415.73	848.43	0	1000
	1	N029-10	3 mdr	2102	677.16	0	1700
	1	N029-10	9 mdr	5682.21	1673.1	0	1800
	1	N029-10	12 mdr	7855.55	2217.6	0	2000
	1	N029-10	15 mdr	11807.5	2920.5	0	1200
	1	N029-10	18 mdr	6239.26	1683	0	2000
	1	N029-10	21 mdr	11852.9	2187.9	0	2000
	1	N029-10	24 mdr	12283.7	1586.97	0	2100
	1	N029-10	27 mdr	4170.19	1169.19	0	1600
	1	N029-10	30 mdr	5932.78	1346.4	0	1800
	1	N029-10	33 mdr	10424	1502.82	0	1700
	1	N029-10	36 mdr	6671.21	1108.8	0	1700
	1	N029-11	Pre op	1338.99	1108.8	0	2500
	1	N029-11	Dag 8	1598.85	1116.72	0	2500
	1	N029-11	Dag 30	894.795	1188	0	2500
	1	N029-11	3 mdr	3140.6	2613.6	0	2500
	1	N029-11	6 mdr	893.171	807.84	0	2500
	1	N029-11	9 mdr	319.57	261.36	0	2500
	1	N029-11	12 mdr	1798.62	1425.6	0	2500
	1	N029-11	15 mdr	549.219	237.6	0	2500
	1	N029-11	18 mdr	617.1	570.24	0	2500
	1	N029-11	21 mdr	280.068	269.28	0	2500
	1	N029-11	24 mdr	1316.48	1188	0	2500
	1	N029-11	27 mdr	787.117	435.6	0	2500
	1	N029-11	30 mdr	1550.87	1108.8	0	2500
	1	N029-11	33 mdr	548.533	435.6	0	2500
	1	N029-11	36 mdr	1705.14	950.4	0	2500
	1	N029-12	Pre op	1742.12	277.2	0	3600
	1	N029-12	Dag 8	1992.59	415.8	0	3500
	1	N029-12	Dag 30	3781.25	693	0	4000
	1	N029-12	3 mdr	1917.61	376.2	0	4300
	1	N029-12	6 mdr	6171	574.2	0	2500
	1	N029-12	9 mdr	2466.61	514.8	0	4300
	1	N029-12	12 mdr	2426.95	356.4	0	4200
	1	N029-12	15 mdr	3722.85	653.4	0	3700
	1	N029-12	18 mdr	3984.02	435.6	0	3500
	1	N029-12	21 mdr	2324.46	336.6	0	3200
	1	N029-12	24 mdr	5047.4	950.4	0	3700
	1	N029-12	27 mdr	21758.6	3742.2	0	4000
	1	N029-12	30 mdr	3552.38	752.4	0	4000
	1	N029-12	33 mdr	32528.5	3999.6	0	2500
	1	N029-13	Pre op	3040.33	910.8	0	3700
	1	N029-13	Dag 8	6376.29	2098.8	0	3200
	1	N029-13	Dag 30	1958.57	495	0	2400
	1	N029-13	3 mdr	1960.05	613.8	0	4000
	1	N029-13	6 mdr	2365.22	396	0	3900
	1	N029-13	9 mdr	3479.07	772.2	0	4300
	1	N029-13	12 mdr	1714.17	811.8	0	4500
	1	N029-13	15 mdr	2642.67	1029.6	0	4000
	1	N029-13	18 mdr	2826	1247.4	0	4300
	1	N029-13	24 mdr	4672.15	1544.4	0	4100
	1	N029-13	27 mdr	1728.66	653.4	0	4300
	1	N029-13	30 mdr	1244.15	356.4	0	2800
	1	N029-13	33 mdr	2382.94	950.4	0	4300
	1	N029-13	36 mdr	1492.24	574.2	0	4200
	1	N029-14	Pre op	1565.78	415.8	0	2500
	1	N029-14	Dag 8	5126.68	1306.8	0	2500
	1	N029-14	Dag 30	6723.63	1485	0	2500
	1	N029-14	3 mdr	10953.5	2732.4	0	2500
	1	N029-15	Pre OP	3506.25	1128.6	0	4000
	1	N029-15	8.dag	52638.5	14473.8	0	2800
	1	N029-15	30.dag	38704.1	18612	0	4500
	1	N029-15	3 mdr.	32270.5	13325.4	0	4400
	1	N029-15	6 mdr.	4874.07	891	0	2800
	1	N029-15	9 mdr.	8278.17	2613.6	0	4100
	1	N029-15	12 mdr.	4632.41	1287	0	3800
	1	N029-15	15 mdr.	3176.25	1089	0	4000
	1	N029-15	18 mdr.	3817.29	1861.2	0	4400
	1	N029-15	21mdr.	12349.6	5128.2	0	4200
	1	N029-15	24mdr.	7795.38	2593.8	0	4500
	1	N029-15	27mdr.	8147.86	1504.8	0	3500
	1	N029-15	30mdr.	26008	5841	0	4500
	1	N029-15	33mdr.	15612.3	5742	0	4100
	1	N029-16	Pre OP	19543.2	298.98	0	2000
	1	N029-16	Dag 8	30188.6	592.02	0	2000
	1	N029-16	Dag 30	7169.53	599.94	0	2000
	1	N029-16	3 mdr	3620.26	302.94	0	2000
	1	N029-16	6 mdr	2203.93	122.76	0	2000
	1	N029-16	9 mdr	1560.15	53.262	0	2000
	1	N029-16	12 mdr	46341.2	312.84	0	2000
	1	N029-16	15 mdr	16430.9	259.38	0	2000
	1	N029-16	18 mdr	60814.7	1748.34	0	2000
	1	N029-16	21 mdr	6836.5	447.48	0	2000
	1	N029-17	Pre op	2607.21	1267.2	0	3300
	1	N029-17	Dag 8	5102.94	2890.8	0	3900
	1	N029-17	Dag 30	4306.14	3564	0	3500
	1	N029-17	3 mdr	2913.41	2178	0	3300
	1	N029-17	6 mdr	1839.4	1029.6	0	2700
	1	N029-17	9 mdr	2978.54	2376	0	4300
	1	N029-17	15 mdr	2293.83	1940.4	0	4300
	1	N029-17	18 mdr	2350.45	792	0	1900
	1	N029-17	21 mdr	2126.43	2574	0	4500
	1	N029-17	24 mdr	1668.01	1108.8	0	4300
	1	N029-17	27 mdr	3046.08	2336.4	0	4100
	1	N029-17	30 mdr	1810.74	1544.4	0	3600
	1	N029-17	33 mdr	4330.53	2970	0	3800
	1	N029-17	36 mdr	1517.86	1188	0	3300
	1	N029-18	Pre op	2503.42	1209.78	0	3700
	1	N029-18	Dag 30	2944.98	1223.64	0	4000
	1	N029-18	6 mdr	2832.59	993.96	0	4000
	1	N029-18	9 mdr	1707.51	673.2	0	2000
	1	N029-18	12 mdr	2041.7	891	0	2000
	1	N029-18	15 mdr	2187.36	938.52	0	2000
	1	N029-18	18 mdr	1765.34	603.9	0	2000
	1	N029-18	21 mdr	6253.72	2292.84	0	1900
	1	N029-18	24 mdr	3091.13	1255.32	0	2000
	1	N029-18	27 mdr	916.193	629.64	Yes*	1800
	1	N029-18	30 mdr	18002.3	4158	0	3900
	1	N029-18	33 mdr	5936.19	3017.52	0	3900
	1	N029-18	36 mdr	15408.3	5979.6	0	3900
	1	N029-19	Pre op	1095.7	435.6	0	3200
	1	N029-19	Dag 8	3575	633.6	0	2200
	1	N029-19	Dag 30	2882.15	811.8	0	4100
	1	N029-19	3 mdr	2104.62	831.6	0	4100
	1	N029-19	6 mdr	3810.27	1762.2	0	4200
	1	N029-19	9 mdr	8404.81	2475	0	2800
	1	N029-19	12 mdr	1991.81	574.2	0	2400
	1	N029-19	15 mdr	1225.03	336.6	0	3200
	1	N029-19	18 mdr	1561.49	693	0	3800
	1	N029-19	21 mdr	1196.21	435.6	0	3800
	1	N029-19	24 mdr	2350.45	851.4	0	3800
	1	N029-19	27 mdr	2380.55	871.2	0	4100
	1	N029-19	30 mdr	1881.4	653.4	0	4100
	1	N029-19	33 mdr	1483.41	772.2	0	3900
	1	N029-19	36 mdr	2363.21	950.4	0	3800
	1	N029-20	Pre op	2550.43	1148.4	0	3900
	1	N029-20	Dag 8	4298.1	3088.8	0	3900
	1	N029-20	Dag 30	1547.61	1148.4	0	4100
	1	N029-20	3 mdr	1221.07	597.96	0	4100
	1	N029-20	6 mdr	1597.05	910.8	0	4200
	1	N029-20	9 mdr	515.745	372.24	0	4300
	1	N029-20	12 mdr	1027.25	871.2	0	4200
	1	N029-20	15 mdr	1378.06	910.8	0	4500
	1	N029-20	18 mdr	1377.46	831.6	0	4400
	1	N029-20	21 mdr	1194.53	831.6	0	3500
	1	N029-20	24 mdr	1498.4	1227.6	0	3900
	1	N029-20	27 mdr	1384.52	990	0	4500
	1	N029-20	30 mdr	1405.05	1108.8	0	4500
	1	N029-20	33 mdr	748.074	463.32	0	3700
	1	N029-20	36 mdr	1488.62	871.2	0	4500
	1	N029-21	Pre op	2121.79	617.76	0	2500
	1	N029-21	30 dag	4645.58	2356.2	0	2500
	1	N029-21	6 mdr	1132.43	728.64	0	2500
	1	N029-21	9 mdr	1142.95	467.28	0	2500
	1	N029-21	12 mdr	874.225	290.268	0	2500
	1	N029-21	15 mdr	1046.18	415.8	0	2500
	1	N029-21	18 mdr	907.46	325.908	0	2500
	1	N029-21	21 mdr	1935.45	883.08	0	2500
	1	N029-21	24 mdr	1191.75	447.48	0	2500
	1	N029-21	27 mdr	1958.46	720.72	0	2500
	1	N029-21	30 mdr	2211.18	839.52	0	2500
	1	N029-21	33 mdr	2451.7	930.6	0	2500
	1	N029-21	36 mdr	2856.72	1271.16	0	2500
	1	N029-22	Pre op	983.398	534.6	0	3900
	1	N029-22	Dag 8	1409.74	871.2	0	3900
	1	N029-22	Dag 30	1287.43	990	0	4500
	1	N029-22	3 mdr	1085.22	772.2	0	4500
	1	N029-22	6 mdr	1179.16	356.4	0	2700
	1	N029-22	9 mdr	1288.5	772.2	0	4300
	1	N029-22	12 mdr	1101.45	673.2	0	4000
	1	N029-22	15 mdr	639.148	336.6	0	3600
	1	N029-22	18 mdr	1391.11	811.8	0	3900
	1	N029-22	21 mdr	1257.32	732.6	0	4500
	1	N029-22	24 mdr	1695.38	990	0	4500
	1	N029-22	27 mdr	2104.35	1168.2	0	4000
	1	N029-22	30 mdr	1514.5	851.4	0	3900
	1	N029-22	33 mdr	877.876	594	0	4300
	1	N029-22	36 mdr	2608.11	1247.4	0	3400
	1	N029-23	Pre op	3122.71	2296.8	0	4300
	1	N029-23	Dag 8	3129.23	2019.6	0	3300
	1	N029-23	Dag 30	1428.47	1029.6	0	4100
	1	N029-23	3 mdr	1851.3	831.6	0	2500
	1	N029-23	6 mdr	2255.68	1584	0	3700
	1	N029-23	9 mdr	1945.31	1029.6	0	2900
	1	N029-23	12 mdr	1375.32	1267.2	0	4300
	1	N029-23	15 mdr	2356.98	2732.4	0	4500
	1	N029-23	18 mdr	2747.06	2494.8	0	3900
	1	N029-23	21 mdr	2679.71	1029.6	0	3900
	1	N029-23	24 mdr	2556.3	1346.4	0	4000
	1	N029-23	30 mdr	1633.35	831.6	0	3900
	1	N029-23	33 mdr	1843.03	1306.8	0	4400
	1	N029-23	36 mdr	2848.15	752.4	0	3900
	1	N029-24	Pre op	1353.29	1069.2	0	4300
	1	N029-24	Dag 8	1002.31	712.8	0	3700
	1	N029-24	Dag 30	1113.45	792	0	4300
	1	N029-24	3 mdr	461.863	285.12	0	3700
	1	N029-24	6 mdr	999.931	950.4	0	4500
	1	N029-24	9 mdr	2846.16	2296.8	0	4500
	1	N029-24	12 mdr	1117.93	871.2	0	4300
	1	N029-24	15 mdr	3227.34	2059.2	0	4400
	1	N029-24	18 mdr	1734.57	752.4	0	2700
	1	N029-24	21 mdr	1142.28	792	0	4100
	1	N029-24	24 mdr	1404.46	831.6	0	3400
	1	N029-24	27 mdr	1690.07	1346.4	0	4100
	1	N029-24	30 mdr	2045.46	1267.2	0	3700
	1	N029-24	33 mdr	2098.75	1425.6	0	3800
	1	N029-24	36 mdr	1821.3	1069.2	0	3600
	1	N029-25	Pre op	1711.38	574.2	0	3300
	1	N029-25	Dag 30	1560.16	336.6	0	2400
	1	N029-25	3 mdr	1219.13	237.6	0	2900
	1	N029-25	6 mdr	3690.22	970.2	0	3600
	1	N029-25	9 mdr	1904.63	514.8	0	3000
	1	N029-25	12 mdr	3762.8	811.8	0	3600
	1	N029-25	15 mdr	5078.22	1009.8	0	2500
	1	N029-25	18 mdr	1210.53	336.6	0	2900
	1	N029-25	21 mdr	1018.66	396	0	3600
	1	N029-25	24 mdr	1457.04	415.8	0	3600
	1	N029-25	30 mdr	2084.8	673.2	0	3700
	1	N029-25	33 mdr	2571.25	792	0	4500
	1	N029-25	36 mdr	1785.59	297	0	3600
	1	N029-26	Pre op.	806.027	548.46	0	1900
	1	N029-26	8 dag.	2454.17	1455.3	0	2000
	1	N029-26	30 dag.	1355.9	889.02	0	2000
	1	N029-26	3 mdr.	1748.23	1031.58	0	1900
	1	N029-26	6 mdr.	1753.8	988.02	0	2000
	1	N029-26	9 mdr.	813.629	322.74	0	1500
	1	N029-26	12 mdr.	1575.21	833.58	0	2000
	1	N029-27	Pre op	3884.82	1584	0	4000
	1	N029-27	Dag 8	4419.34	1940.4	0	4500
	1	N029-27	Dag 30	2151.45	1029.6	0	4200
	1	N029-27	3 mdr	5178.21	1861.2	0	4500
	1	N029-27	6 mdr	4696.71	1465.2	0	3800
	1	N029-27	9 mdr	4530.3	2039.4	0	4500
	1	N029-27	12 mdr	2781.62	1524.6	0	4400
	1	N029-27	15 mdr	5112.43	1900.8	0	3800
	1	N029-27	18 mdr	5104.69	2395.8	0	4400
	1	N029-27	21 mdr	5324.31	2534.4	0	4500
	1	N029-27	24 mdr	8163.81	3979.8	0	4400
	1	N029-27	27 mdr	6993.15	2851.2	0	4300
	1	N029-27	30 mdr	5673.75	2356.2	0	4400
	1	N029-27	33 mdr	6159.38	2732.4	0	4500
	1	N029-27	36 mdr	6451.5	2554.2	0	4500
	2	N030-1	3 mdr	3850.36	7944	0	8000
	2	N030-2	3 mdr	1811.31	7632	0	8000
	2	N030-3	1 mdr	3195.48	8226	0	8000
	2	N030-4	3 mdr	1370.7	1500	0	8000
	2	N030-5	3 mdr	2678.56	9468	0	8000
	2	N030-6	3 mdr	4244.35	8484	Yes*	8000
	2	N030-7	3 mdr	3815.99	4804	0	8000
	2	N030-8	3 mdr	4997.92	8448	0	8000
	2	N030-9	1 mdr	32065.6	26185	0	8000
	2	N030-10	3 mdr	39188.2	13018	Yes*	8000
	2	N030-11	3 mdr	6137.78	12274	0	8000
	2	N030-12	3 mdr	8467.72	9444	0	8000
	2	N030-13	3 mdr	6763.97	9276	0	8000
	2	N030-14	3 mdr	15345.4	10395	0	8000
	2	N030-15	3 mdr	18900	28557	0	8000
	2	N030-16	3 mdr	14334.5	8578	Yes*	8000
	2	N030-17	1 mdr	4004.1	10557	0	8000
	2	N030-18	3 mdr	4454.88	9404	0	8000
	* Flagged samples
