# Supplementary material for: Clinical Implications of Monitoring Circulating Tumor DNA in Patients with Colorectal Cancer
Source: Oxford University Press journal article supplement (doi:10.1158/1078-0432.ccr-17-0510), 2017-06-09
Supplement: 10780432ccr170510-sup-179331_2_supp_4076834_rqwr57.docx [file 10780432ccr170510-sup-179331_2_supp_4076834_rqwr57.docx]

**Supplementary Tables**

**Supplementary Table 1.** Primers, TaqMan probes and amplification protocols for PCR and ddPCR assays

**Supplementary Table 2.** Basic mate pair and WES characteristics

**Supplementary Table 3.** Somatic structural variants and point mutations identified in primary tumor and profiled in plasma

**Supplementary Table 4.** Clinicopathological patient characteristics

**Supplementary Table 5.** Relapse detection by standard-of-care CT imaging, ctDNA and CEA analysis

**Supplementary Table 6.** Summary of plasma samples for DNA purification
